# Supplementary material
Source: PubMed Central journal article supplement (PMC3918781)
Supplement: 1323416111_pnas.201323416SI.pdf [file 1323416111_pnas.201323416SI.pdf]

# Supporting Information

Inoue et al. 10.1073/pnas.1323416111

## SI Materials and Methods

**Fertility.** Each male mouse was allowed to breed with two wild-type (WT) female mice for 2 wk. Females were checked every morning for copulatory plugs. Females were separated from males after 2 wk and monitored to assess pregnancy and litter size.

**Sperm Numbers and Motility.** Sperm were isolated from epididymides and incubated for 30 min in warm Embryomax Human Tubal Fluid medium [Millipore; catalog no. MR-070-D(CH)]. Sperm numbers and motility were evaluated under a light microscope according to standard protocols.

**Histology and Immunohistochemistry.** Hematoxylin/eosin (H&E) staining and immunohistochemistry (IHC) were examined as previously described (1). Briefly, samples isolated testes and epididymides for immunohistochemistry were fixed in either Bouin's solution (Sigma; catalog no. HT10132) or formalin. Immunostaining was performed with antibodies recognizing the following proteins: TAp73 (Santa Cruz Biotechnology; catalog no. sc-7957), protamin-1 (Santa Cruz Biotechnology; catalog no. sc-23105), Ki67 (Dako; catalog no. M7249),  $\gamma$ H2AX (Millipore; catalog no. 07-164), and 8-hydroxy-2'-deoxyguanosine (Abcam; catalog no. AB48508). All samples for IHC were formalin-fixed, except samples for IHC of  $\gamma$ H2AX or 8-hydroxy-2'-deoxyguanosine, which were fixed in Bouin's solution. Images were digitized using an Olympus-Hamamatsu Nanozoomer (2.0HT) slide scanner.

**N-Acetyl-L-Cysteine Administration.** Sterile drinking water containing 10 mg/mL N-acetyl-L-cysteine (NAC) (Sigma; catalog no. A7250) was adjusted to pH 7.4. Mice were allowed free access to either standard drinking water or NAC-supplemented drinking water from the age of 3 wk. The NAC-supplemented water was replaced every 2 d. These experiments were approved

by a University Health Network Animal Care Committee (ID: AUP1996).

**Electron Microscopy.** Testes were excised, bisected, and fixed overnight at 4 °C in 2% (wt/vol) glutaraldehyde in 0.1 M sodium cacodylate buffer (pH 7.4). Fixed samples were cut into small cubes and postfixed for 1 h at room temperature in 1% osmium tetroxide/1% potassium ferrocyanide. Cells were then stained en bloc overnight in 5% (wt/vol) aqueous uranyl acetate, dehydrated, and embedded in Taab epoxy resin (Taab Laboratories Equipment). Ultrathin sections were stained with lead citrate, and examined using a Jeol 100-CXII electron microscope (Jeol). Images were recorded and analyzed with a Megaview 3 digital camera and iTEM software (Olympus Soft Imaging Solutions).

**Measurement of Metabolites in Serum.** Serum from male mice were evaluated for level of several metabolites. Analyses were done by the Center for Modeling Human Disease (CMHD) and CMHD Physiology Core Department (Toronto, Canada).

**ChIP.** Saos-2 tet-on inducible cells for HA-TAp73 $\beta$  expression were exposed to 2  $\mu$ g/mL doxycycline for 16 h. Cells were collected at 80% confluence and fixed in 1% formaldehyde. Chromatin was sheared by sonication and immunoprecipitated for 2 h with anti-HA antibody (Covance) or mouse IgG according to MAGnify ChIP system procedure (Invitrogen). The coimmunoprecipitated genomic DNA fragments and input DNA were amplified by PCR and run on agarose gel. Primers used were as follows: MDM2, GGTTGACTCAGCTTTTCCTCTTG (forward) and GGAAAATGCATGGTTTAAATAGCC (reverse); p21, GGGTCTGCTACTGTGTCCTC (forward) and GCAGAGGATGGATGGTTGTTCACTCT (reverse); and MMP13, TCAGGTAGACACAAGACATCTC (forward) and GTGGGAAGAAGCAGAGAGTAG (reverse).

1. Inoue S, et al. (2013) Mule/Huwe/Arf-BP1 suppresses Ras-driven tumorigenesis by preventing c-Myc/Miz1-mediated down-regulation of p21 and p15. *Gnes Dev* 27(10):1101–1114.

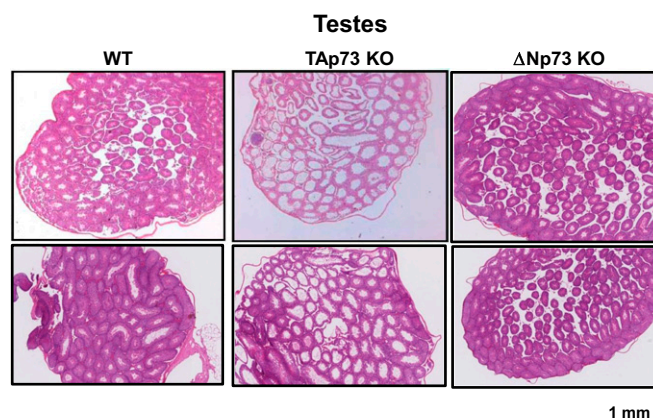

**Fig. S1.** Unique histological alterations are observed in testes of TAp73 KO mice. Histological sections of testes from WT, TAp73 KO, and  $\Delta$ Np73 KO mice at 11 wk of age stained with H&E. Only in TAp73 KO mice are elongated spermatids or mature spermatozoa missing from the seminiferous tubules.

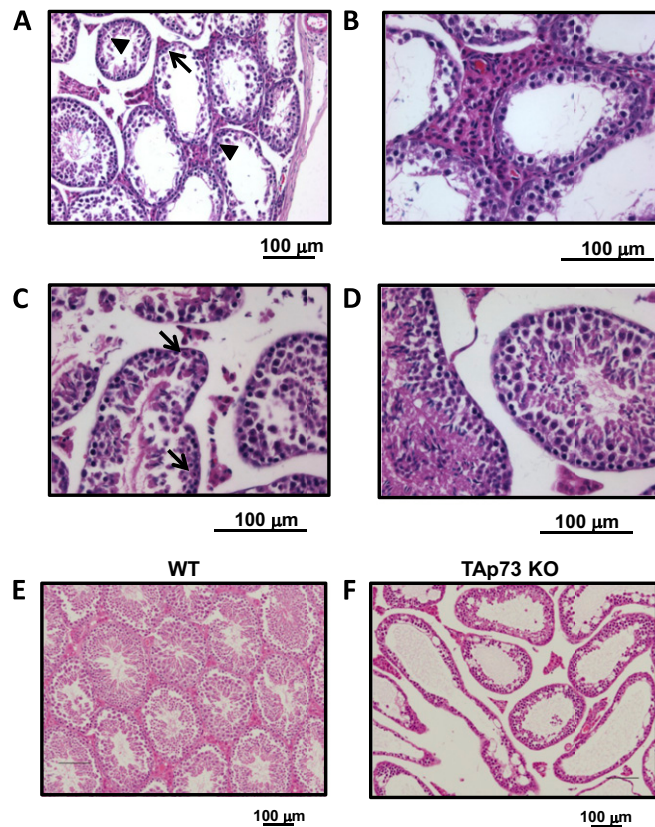

**Fig. S2.** Severity of the histological alterations in TAp73 KO testes increases with age. (A–D) Representative H&E-stained histological sections of seminiferous tubules from 11-wk-old TAp73 KO mice. (A) Seminiferous tubules contain a hypoplastic epithelium comprised of Sertoli cells and one or two layers of germ cells/spermatocytes but no or very few spermatids or mature spermatozoa. Although early synchronous maturation is present in the tubules, the majority of cells present are either early germ cells (arrows) or early round spermatocytes (arrow heads). (B) Higher magnification of A shows seminiferous tubules with marked deficit in elongating spermatids, degenerating tubule epithelium, and decreased number of germ cells. (C) Seminiferous tubules with scattered apoptotic spermatogonia (arrows). (D) Sections of testes from 11-wk-old  $\Delta$ Np73 KO control mouse are not different from wild type. (E and F) H&E-stained histological sections of testes from 36-wk-old WT (E) and TAp73 KO (F) mice.









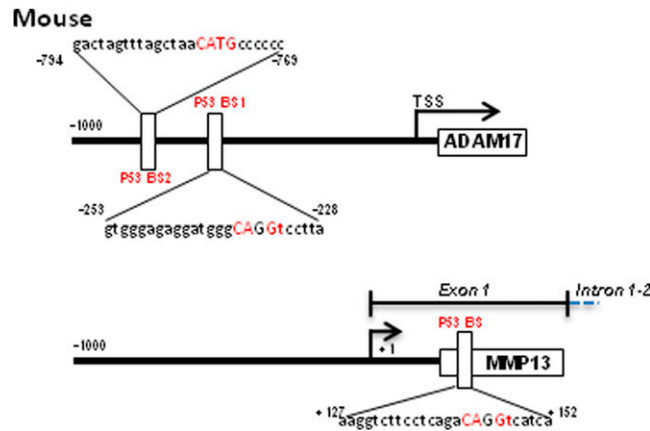

**Fig. S8.** Positive p53-binding sites in mouse ADAM17 and MMP13. Bioinformatics analysis of mouse ADAM17 and MMP13 promoters using the MatInspector program by Genomatrix has been analyzed for putative p53-binding sites (p53BS). Two p53 BSs in mouse ADAM17 were found; the first is located at -794/-769 bp from the ATG and the second at -253/-228 bp from the ATG. One p53BS in mouse MMP13 was found that is located at +127/+152 bp from the ATG.

**Table S1. Male fertility data from TAp73 KO mice at different age and genetic background**

| *Strain    | Genotype | Age (wk) | n  | Plugs        | Fertility   | Littersize | †Sperm               |
|------------|----------|----------|----|--------------|-------------|------------|----------------------|
| TAp73 (F1) | WT       | 8        | 7  | 100% (7/7)   | 100% (7/7)  | 7.4        | Yes/moving well      |
|            | TAp73 KO |          | 6  | 100% (6/6)   | 33.3% (2/6) | 2          | Yes/partially moving |
|            | WT       | 16       | 5  | ‡n.t.        | ‡n.t.       | 7.4        | Yes/moving well      |
|            | TAp73 KO |          | 3  | ‡n.t.        | ‡n.t.       | 0          | Yes/Not moving       |
|            | WT       | 36       | 10 | ‡n.t.        | ‡n.t.       | ‡n.t.      | Yes/moving well      |
| TAp73 (F6) | TAp73 KO |          | 10 | ‡n.t.        | ‡n.t.       | ‡n.t.      | Yes/Not moving       |
|            | WT       | 7        | 10 | 90% (9/10)   | 90% (9/10)  | 6.3        | Yes/moving well      |
|            | TAp73 KO |          | 10 | 80% (8/10)   | 40% (4/10)  | 3.8        | Yes/moving well      |
|            | WT       | 11       | 8  | 87.5% (7/8)  | 87.5% (7/8) | 6          | Yes/moving well      |
|            | TAp73 KO |          | 11 | 81.8% (9/11) | 0% (0/11)   | 0          | No sperms            |
| TAp73 (F9) | WT       | 16       | 4  | 100% (4/4)   | 100% (4/4)  | 5.3        | Yes/moving well      |
|            | TAp73 KO |          | 4  | 50% (2/4)    | 0% (0/4)    | 0          | No sperms            |
|            | WT       | 11       | 9  | 100% (9/9)   | 100% (9/9)  | 6.1        | Yes/moving well      |
|            | TAp73 KO |          | 10 | 90% (9/10)   | 50% (5/10)  | 4          | Yes/moving well      |
|            | WT       | 16       | 10 | 90% (9/10)   | 80% (8/10)  | 5.4        | Yes/moving well      |
| ΔNp73 (F9) | TAp73 KO |          | 10 | 80% (8/10)   | 30% (3/10)  | 3.7        | less/moving          |
|            | Δp73 KO  | 11       | 6  | 100% (6/6)   | 100% (6/6)  | 5.8        | Yes/moving well      |
|            | p53 (F9) | 11       | 6  | 83.3% (5/6)  | 83.3% (5/6) | 5.2        | Yes/moving well      |

\*C57BL6:129Ola

†Motility of isolated sperms from epididymides was assessed in under microscope.

‡Not tested.

**Table S2. NAC administration does not rescue male infertility of TAp73 KO**

| Treatment   | TAp73 genotype | Age, wk | n | Plugs      | Fertility  |
|-------------|----------------|---------|---|------------|------------|
| Without NAC | WT             | 16      | 4 | 100% (4/4) | 100% (4/4) |
|             | TAp73 KO       |         | 5 | 100% (5/5) | 0% (5/5)   |
| With NAC    | WT             | 16      | 4 | 100% (4/4) | 100% (4/4) |
|             | TAp73 KO       |         | 4 | 100% (4/4) | 0% (4/4)   |

**Table S3. List of primers for qPCR for mouse genes**

| Primer for qPCR | Forward                  | Reverse                 |
|-----------------|--------------------------|-------------------------|
| 18S rRNA        | CGGCGACGACCCATTGCGAAC    | GAATCGAACCTGATTCGCCCGTC |
| CDH1            | CAGGTCTCCTCATGGCTTTGC    | CTTCCGAAAAGAAGGCTGTCC   |
| PLZF            | CCCAGTTCTCAAAGGAGGATG    | TTCCACACAGCAGACAGAAG    |
| DMC1            | ATGAAGGAGGATCAAAGTTGTGC  | CATGCTTCTGCAACAGGTCAA   |
| ID2             | ATGAAAGCCTTCAGTCCGGTG    | AGCAGACTCATCGGGTCGT     |
| PGK2            | TTCTGCTAAGTTGACTCTGGACA  | AGCCTTGATTCTCTGGTTGTTG  |
| PRM1            | CCGTGCGAGACGAAGATGTC     | CACCTTATGGTGTATGAGCGG   |
| ALCAM           | ATGGCATCTAAGGTGTCCCCT    | CTGAGTTGACAGTGTACCATCC  |
| JAM2            | GTGCCACTTCTGTTATGACTG    | TTCCCTAGCAAACCTGTGCCA   |
| VCAM1           | AGTTGGGATTTCGGTTGTTCT    | CCCCTCATTCCCTACCACCC    |
| ICAM1           | GTGATGCTCAGGTATCCATCCA   | CACAGTTCTCAAAGCACAGCG   |
| ICAM2           | TGGTCCGAGAAGCAGATAGTAG   | GAGGCTGGTACACCCTGATG    |
| ICAM4           | GGCCACAAGTACACTCTGC      | GGCTTAAAGCGAGGACTGTCA   |
| ICAM5           | TCCGAACTTTCCAGCGACC      | CTACGAAACTGCGGCGAATC    |
| TJP1            | GCCGCTAAGAGCACAGCAA      | TCCCCACTTGAAAATGAGGA    |
| TJP2            | ATGGGAGCAGTACACCGTGA     | TGACCACCTGTGATTTTCTTG   |
| SERPINE1        | TTCAGCCCTTGCTTGCCCTC     | ACACTTTTACTCCGAAGTCGGT  |
| SERPINE2        | CACATGGGATCGCGTCCATC     | CAGCACTTTACCAACTCCGTTTA |
| SERPINA5        | AGAAGAAGGCTAAAGAGTCTCTCG | CTCATAGACACGCTCAAGGGG   |
| SPINK2          | CATGAGACTCTCGACTCTTCCG   | CGCACACAGGGTTGAGGTT     |
| SPINK3          | TTTGGCCCTGCTGAGTTTAGC    | TGGCATAAGTAATTCGTCAGTC  |
| SPINT1          | GTCGGCGTATGGCTCCTTT      | GCTTCGGTGTCAGCACA       |
| ADAM10          | ATGGTGTTGCCGACAGTGTTA    | GTTTGGCACGCTGGTGTTTTT   |
| ADAM12          | CACACGGATCATTGTTACTACCA  | ATTGGCTCTAAGCTGTACGTTTT |
| ADAM17          | GTACGTCGATGCAGAGCAAA     | AAACCAGAAGACAGCCCAACG   |
| ADAM19          | TCAGTGGCGGACTTCAGAAAAG   | GCAAAAAGGTGCTCGTCTTTC   |
| MMP1B           | GCTCATGCTTTTCTGCCAGG     | TAGAAATGGGAGAGTCCAAGGG  |
| MMP2            | CAAGTTCCCGGCGGATGTC      | TTCTGGTCAAGGTCACCTGTC   |
| MMP13           | CTTCTTCTTGTGAGCTGGACTC   | CTGTGGAGGTCACCTGTAGACT  |
| MMP14           | CAGTATGGCTACCTACCTCCAG   | GCCTTGCCCTGCTACTTGTA    |
| TIMP1           | GCAACTCGGACCTGGTCATAA    | CGGCCGCTGATGAGAACT      |
| TIMP2           | TCAGAGCCAAAGCAGTGAGC     | GCCGTGTAGATAAACTCGATGTC |
| TIMP3           | CTTCTGCAACTCCGACATCGT    | GGGGCATCTTACTGAAGCCTC   |
| TIMP4           | TGTGGCTGCCAAATCACCA      | TCATGCAGACATAGTGTGGG    |
| TP53            | CTCTCCCCCGCAAAGAAAAA     | CGGAACATCTCGAAGCGTTA    |
| CDKN1A          | CCACTTTGCCAGCAGAATAA     | ACGGGACCGAAGAGACAAC     |
| MDM2            | CCAGCTTCGGAACAAGAGAC     | GTCGTTTTGCGCTCCAAC      |
| BAX             | TGGAGATGAACGAGACAGCA     | GAAGTTGCCATCAGCAACA     |
| PUMA            | TCACCCTGGAGGGTCAATGTA    | GCGGGTGTAGGCACCTAGT     |
| NOXA            | ATCAAGGGCTGAAGGGATTT     | AGAGAGGCACCTGGGATATG    |
| CDKN2A          | CATGTTGTTGAGGCTAGAGAGG   | TCGAATCTGCACCCTAGTTG    |
| CDKN2B          | ATCTGGAGCAGCATGGAGTC     | TCGAATCTGCACCCTAGTTG    |
| NRF2            | GCCCACATTTCCAAACAAGAT    | CCAGAGAGCTATTGAGGACTG   |
| NQO1            | AGGATGGGAGGTAAGCAATC     | AGGCGTCCCTTATATGCTA     |
| HO-1            | AAGCCGAGAATGCTGAGTTCA    | GCCGTGTAGATATGGTACAAGGA |
| GCLC            | GGCTCTCTGCACCATCACTT     | GTTAGAGTACCGAAGCGGGG    |
| GCLM            | AGGAGCTTCGGGACTGTATCC    | GGGACATGGTGCATTCAAAA    |
| Cox4i1          | TCACTGCGCTCGTTCTGAT      | CGATCGAAAGTATGAGGGAT    |
| CYP11A1         | AGGTCCTTCAATGAGATCCCTT   | TCCCTGTAATGGGGCCATAC    |
| HSD3B1          | TGGACAAAGTATTCGGACCAGA   | GGCACACTTGCTTGAACACAG   |
| CYP21A2         | AGACCCCTTACGACTGTGTC     | CCGACTCTCTTGGATCTGCTT   |
| CYP11B1         | CAGATTGTGTTTGTGACGTTGC   | CGGTTGAAGTACCATTCTGGC   |
| CYP17A1         | GCCCAAGTCAAAGACACCTAAT   | GTACCCAGGCGAAGAGAATAGA  |
| HSB17B1         | ACTTGGCTGTTTCGCCTAGC     | GAGGGCATCCTTGAGTCTCG    |
| HSB17B2         | ATGAGCCCGTTTGCCTCTG      | CCACAGGTAACAAGTCTTGGTC  |
| HSD17B4         | AGGGGACTTCAAGGGAATTGG    | GCCTGTTCAACTGAATCGTAA   |
| HSD17B6         | GGAGCGTGTGGAGACAGAG      | GAGGTTCACTTGAAGATAGGCA  |
| HSD17B7         | TTTTTCTGCGGCATCTTTTCAAG  | AGTGACCGAGTCACTTCTGGGT  |
| HSD17B10        | GCTTGGTCGCGGTAGTAACTG    | TGGGGCAAATAGCAGCTTTC    |
| HSD17B11        | AAGAACGGCATCGAGGAAACA    | TCTTGCCTAGCAAATAAGTCTG  |
| HSD17B12        | GGTCTTGAGATTGGCGTTTTAGT  | GTCCAAGTCGGGAATTTCCAG   |
| CYP19           | ATGTTCTTGGAAATGCTGAACCC  | AGGACCTGGTATTGAAGACGAG  |
| AR              | CTGGGAAGGGTCTACCCAC      | GGTGCATGTTAGCGGCCCTC    |
